# Supplementary material
Source: PubMed Central journal article supplement (PMC5752392)

727 **Supplemental Figure 1:** The correlation coefficients determined from spearman  
728 correlation analysis between hs-CRP and forearm muscle protein turnover components  
729 using regular scale for hs-CRP among whole study population (n=129).

730 **Supplemental Figure 2: The rates of forearm muscle protein components**  
731 **according to hsCRP concentrations grouped by quintiles among non-diabetic**  
732 **MHD patients.** We examined protein turnover markers are presented as median  
733 (interquartile range) after categorizing patients into quartiles based on their hs-CRP

734 values. There were statistically significant associations between hs-CRP quintiles and  
735 forearm skeletal muscle protein synthesis (**S2A**), protein degradation (**S2B**) and net  
736 forearm skeletal muscle protein balance (**S3C**) ( $p < 0.001$  for all). The unadjusted  
737 comparisons of four groups defined by hs-CRP quintiles and various skeletal muscle  
738 and whole body protein turnover components were performed using the Kruskal-Wallis  
739 test and the data are depicted as box plots.

740 **Supplemental Figure 3: The correlation coefficients between hs-CRP and forearm**  
741 **muscle protein turnover components in non-diabetic MHD patients (n=100).**

742 Spearman correlation analysis showed an inverse (negative) correlation between hs-  
743 CRP (log scale) and forearm skeletal muscle protein synthesis (**S3A**) whereas a direct  
744 (positive) correlation was observed with protein degradation (**S3B**). The inverse  
745 (negative) correlation between hs-CRP and net protein balance was remarkably robust  
746 (**S3C**).

747 **Supplemental Figure 4: The correlation coefficients between serum interleukin-6**  
748 **(IL-6) concentrations and forearm muscle protein turnover components in MHD**

749 **patients (n=56).** Spearman correlation analysis showed an inverse (negative)  
750 correlation between IL-6 (log scale) and forearm net skeletal muscle protein balance  
751 although this did not reach statistical significance.

752

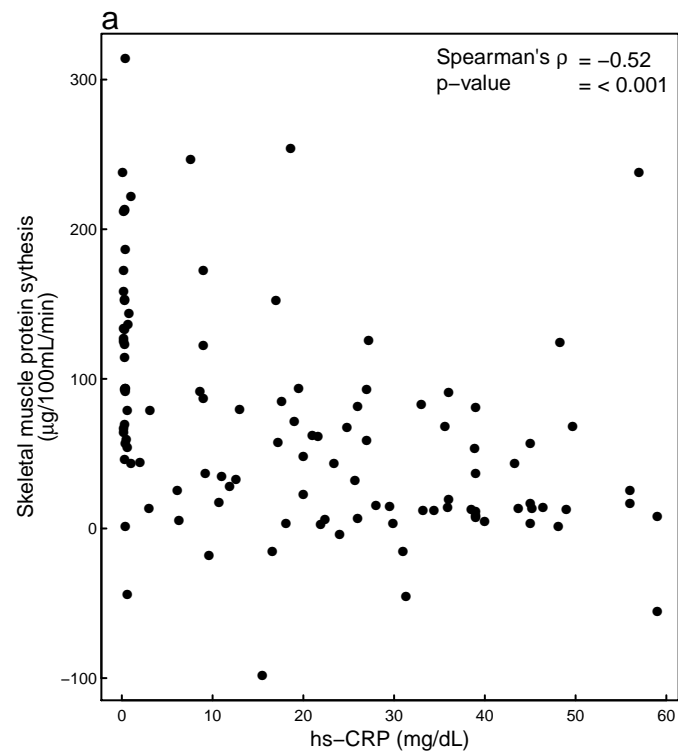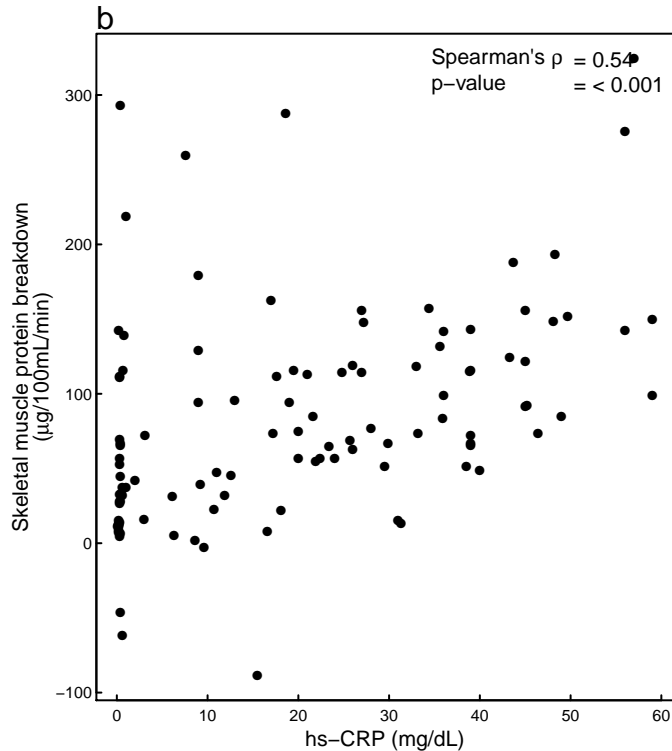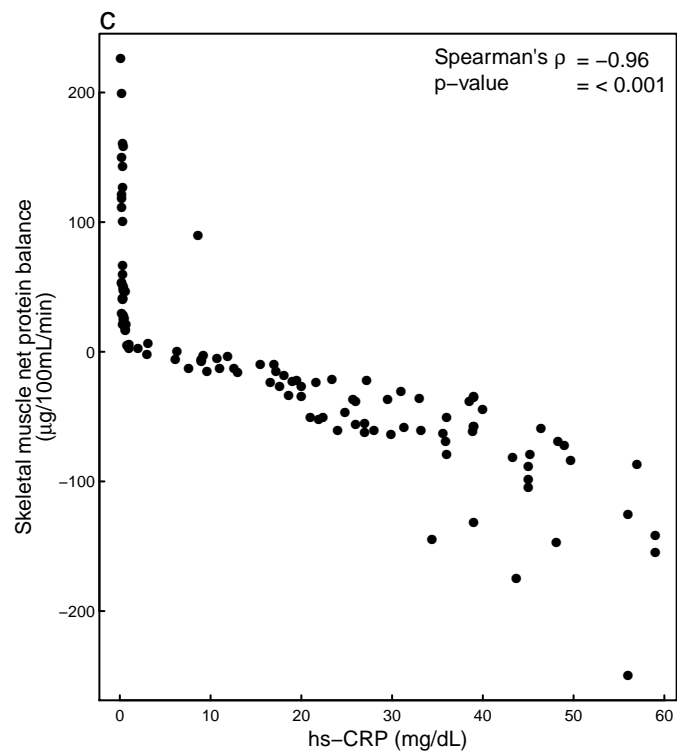

Supplemental Figure 2

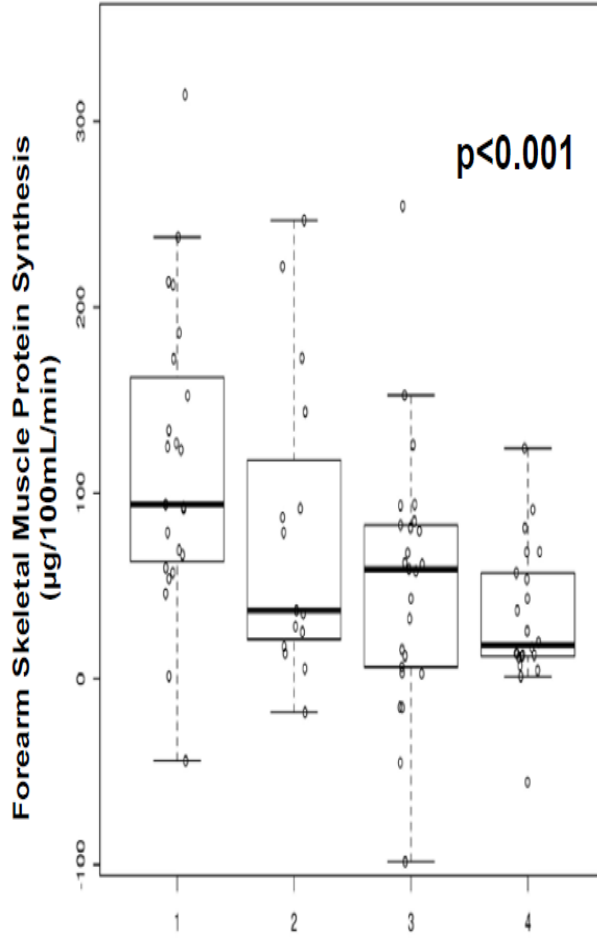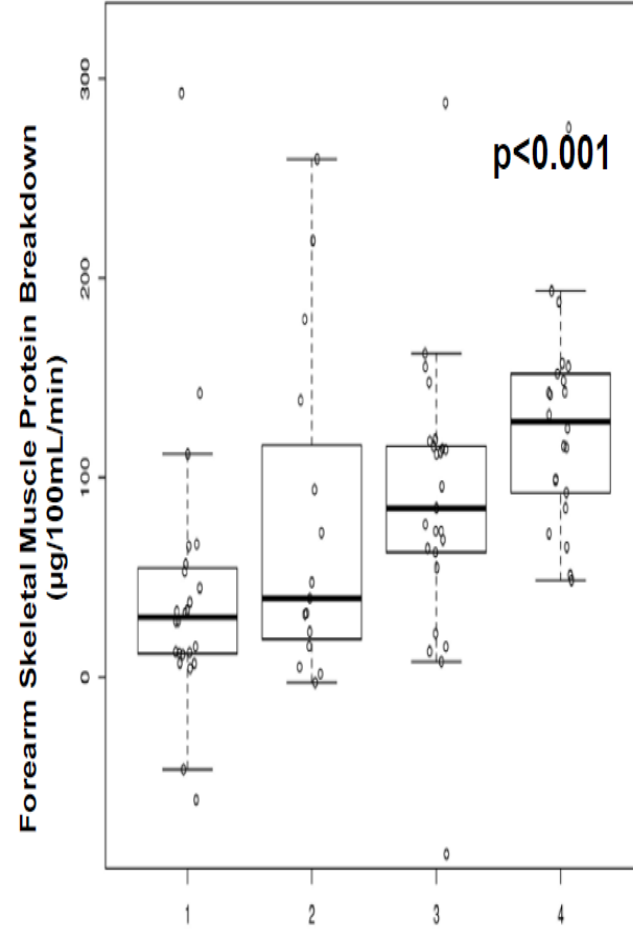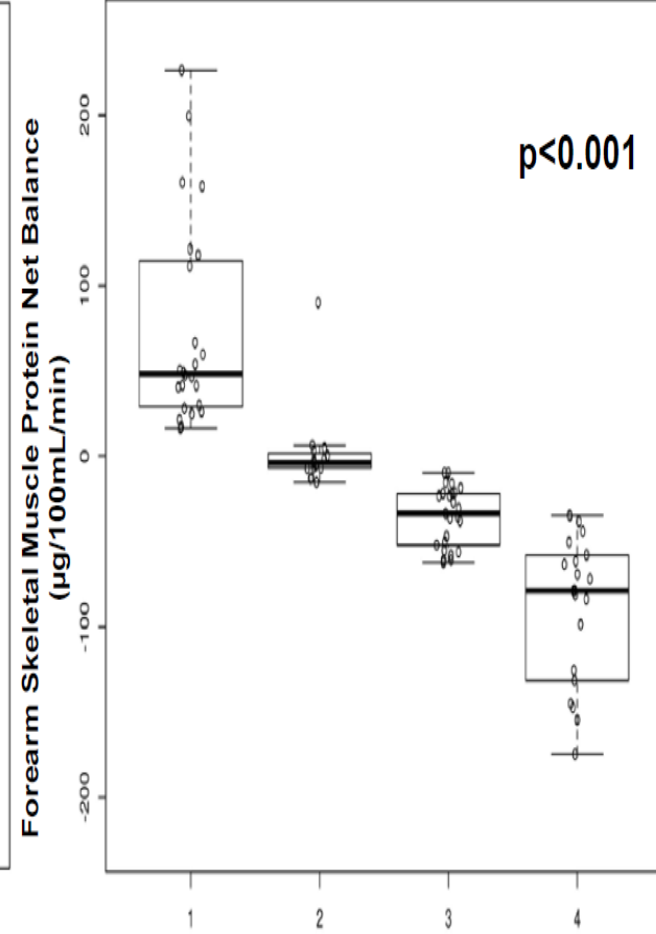

Forearm Skeletal Muscle Protein Synthesis  
( $\mu\text{g}/100\text{mL}/\text{min}$ )

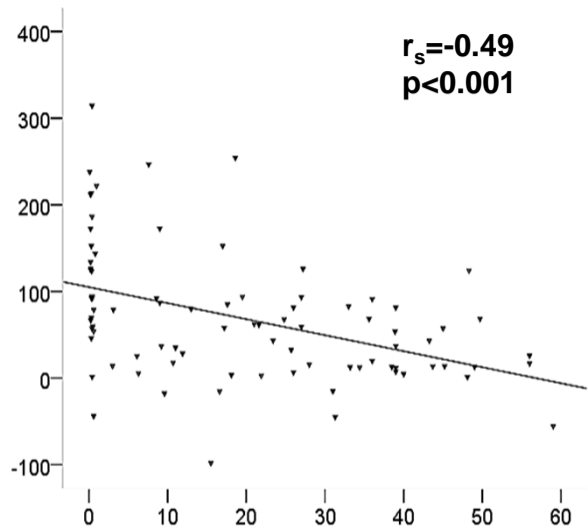

Forearm Skeletal Muscle Protein Breakdown  
( $\mu\text{g}/100\text{mL}/\text{min}$ )

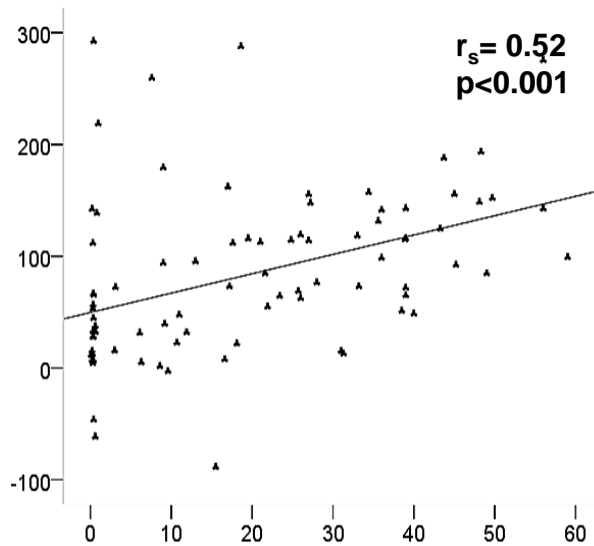

hs-CRP (mg/L)

Forearm Skeletal Muscle Protein Net Balance  
( $\mu\text{g}/100\text{mL}/\text{min}$ )

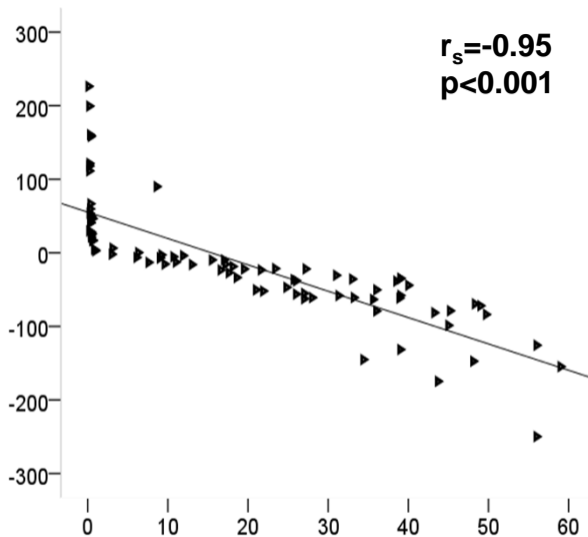

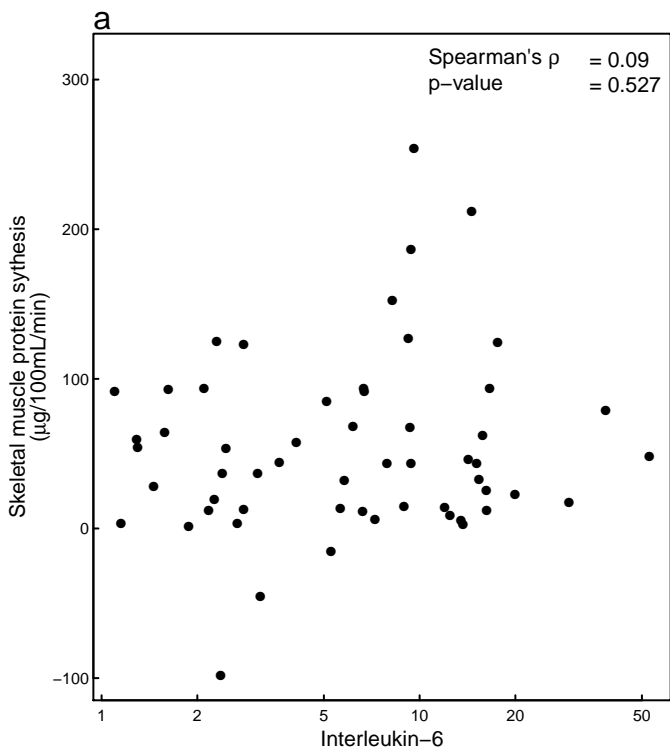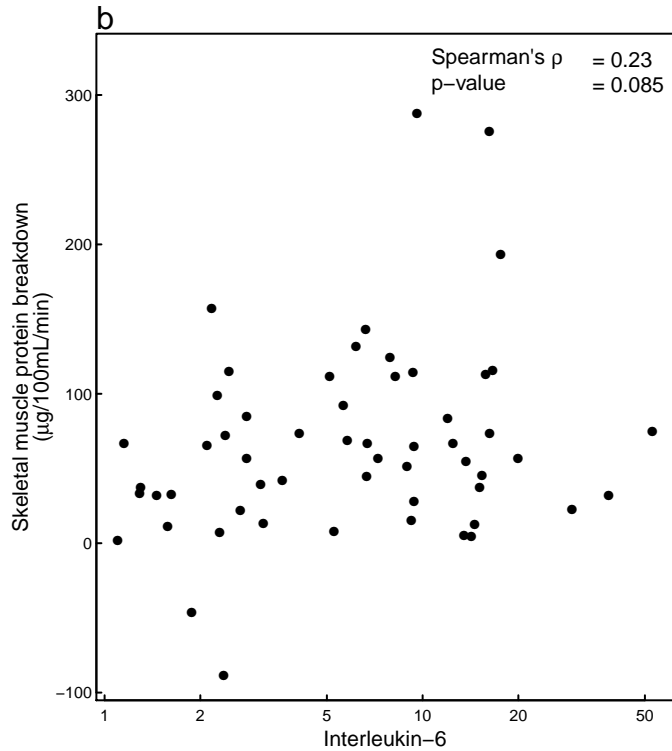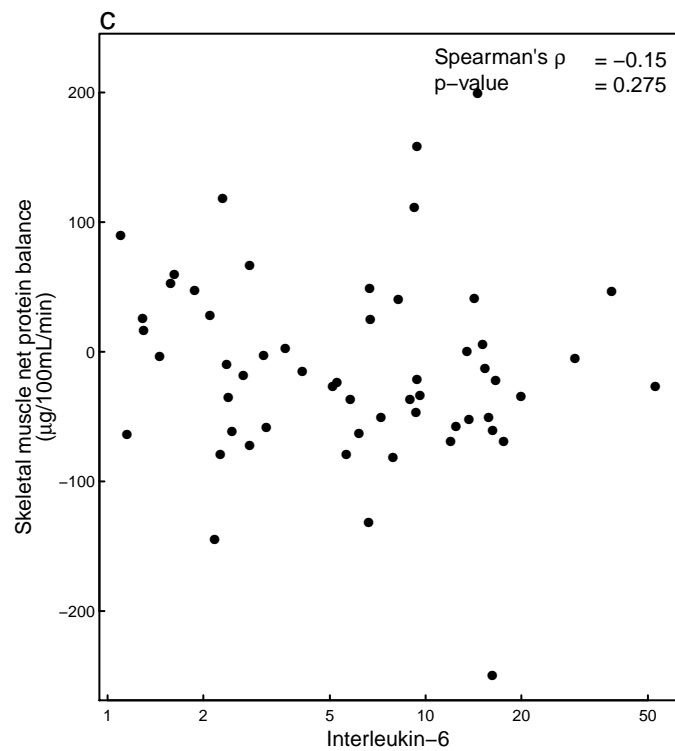

Supplement: jciinsight-2-95185-s001.pdf [file jciinsight-2-95185-s001.pdf]
